# Supplementary material for: Prognostic implication of a novel lactate score correlating with immunotherapeutic responses in pan-cancer
Source: publisher site journal article supplement (doi:10.18632/aging.205423), 2024-01-09
Supplement: Supplementary file [file aging-v16i1-205423-supplementary-material-SD1.pdf]

SUPPLEMENTARY FIGURES

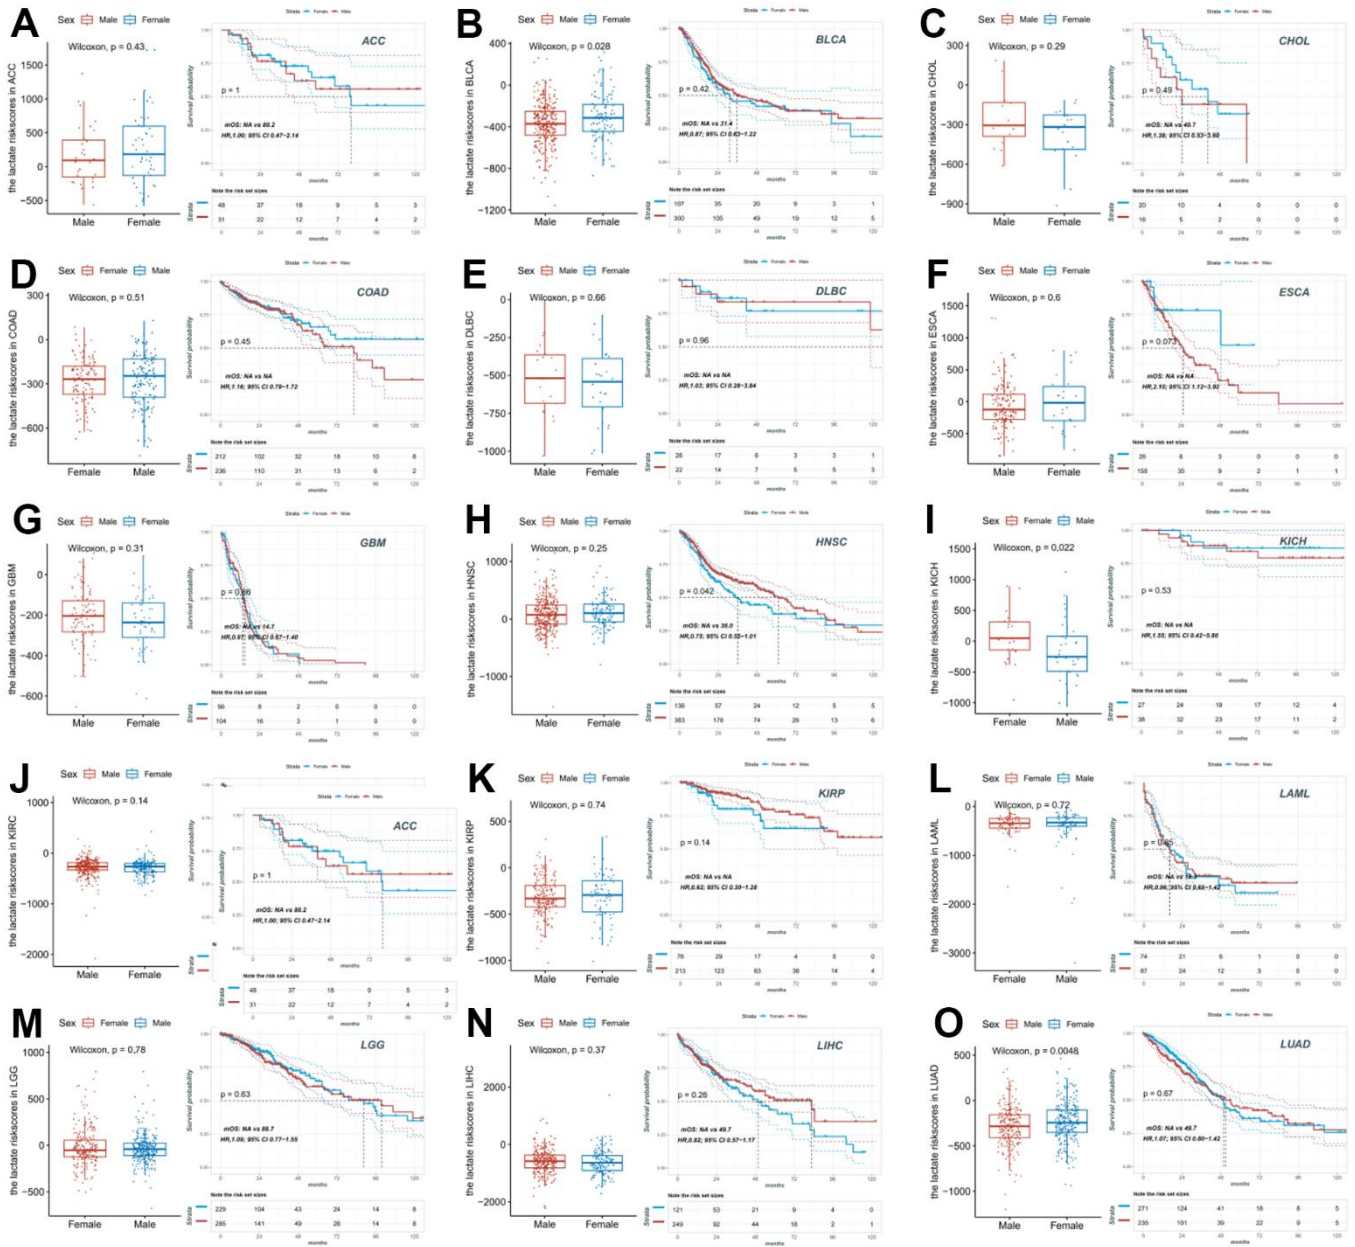

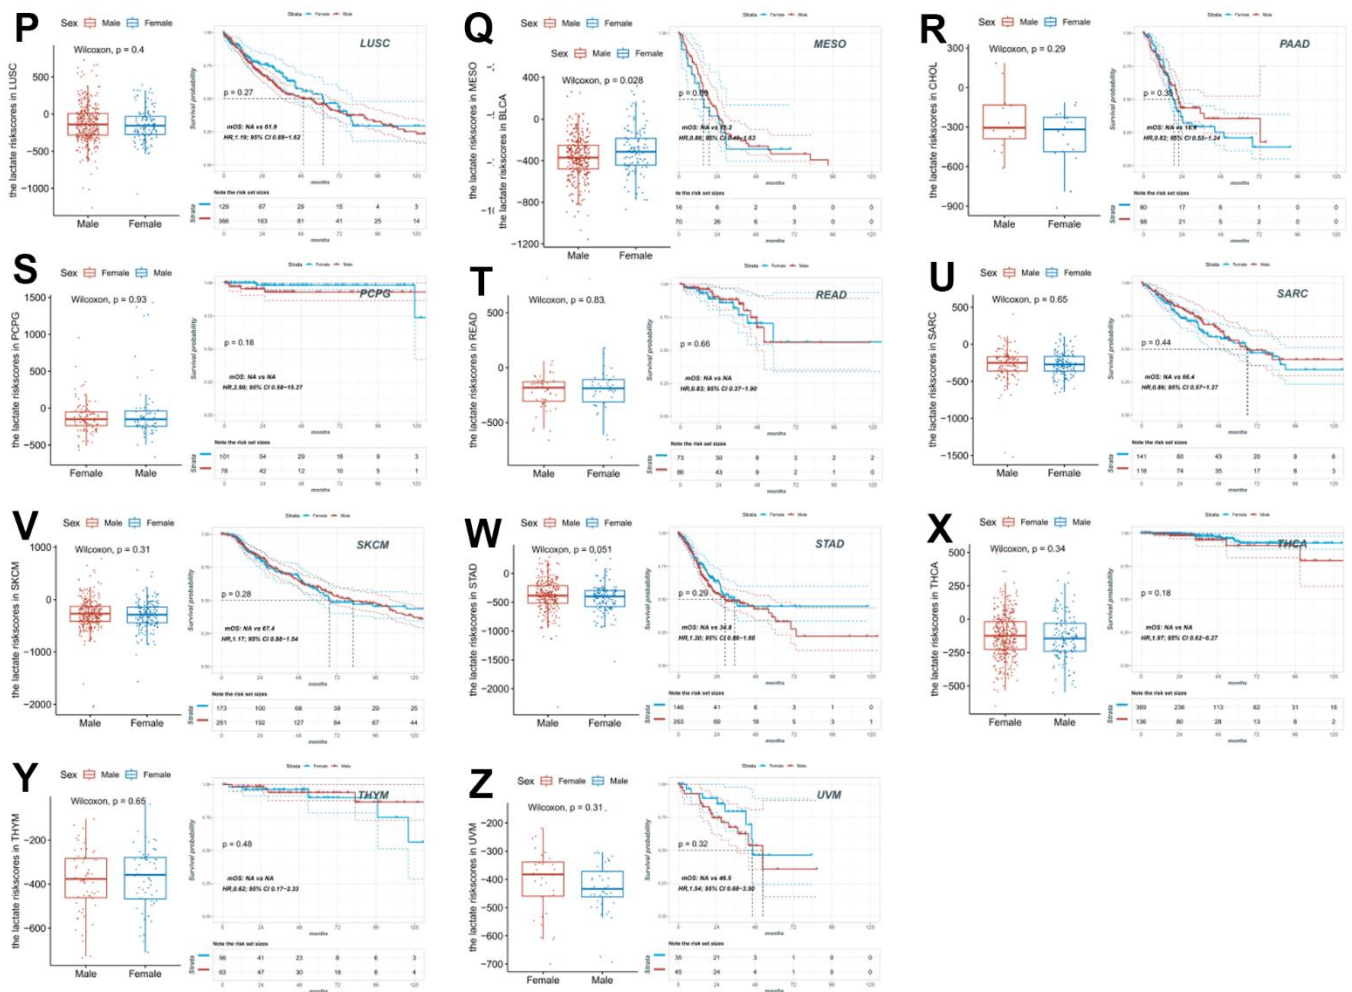

**Supplementary Figure 1. The impact of the sex on the lactate scores and the prognosis in pan-cancer.** The boxplots of lactate scores and the KM plots between male and female patients with different tumors (A–Z).

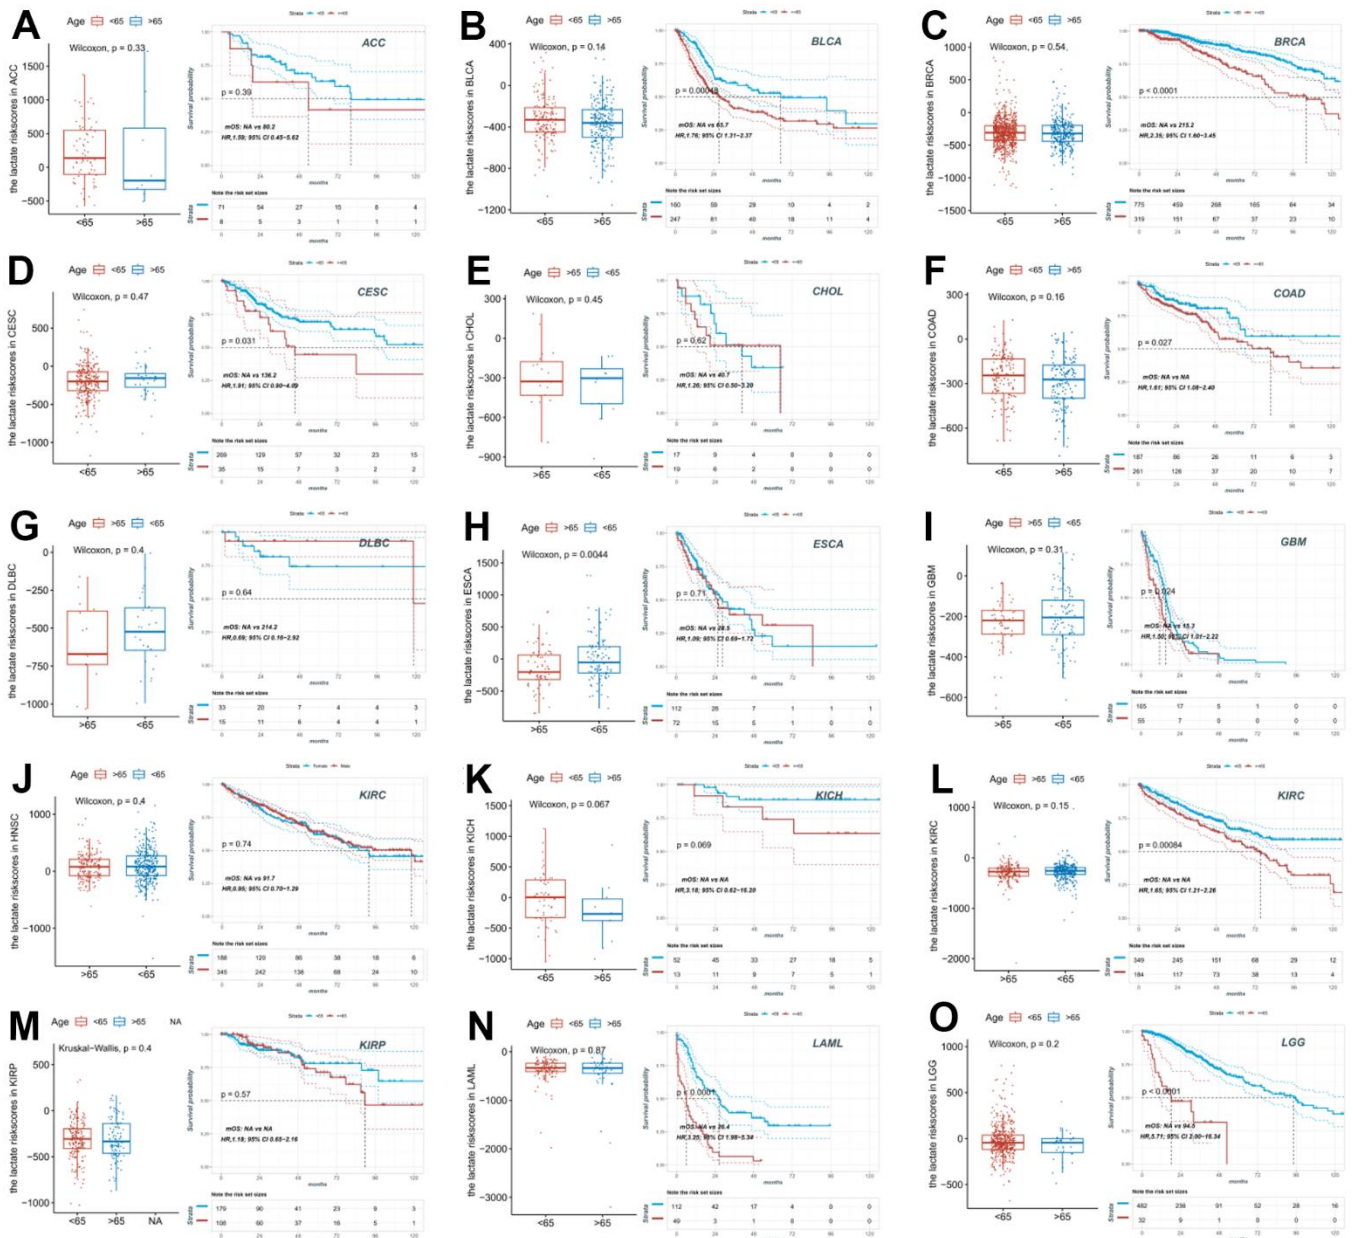

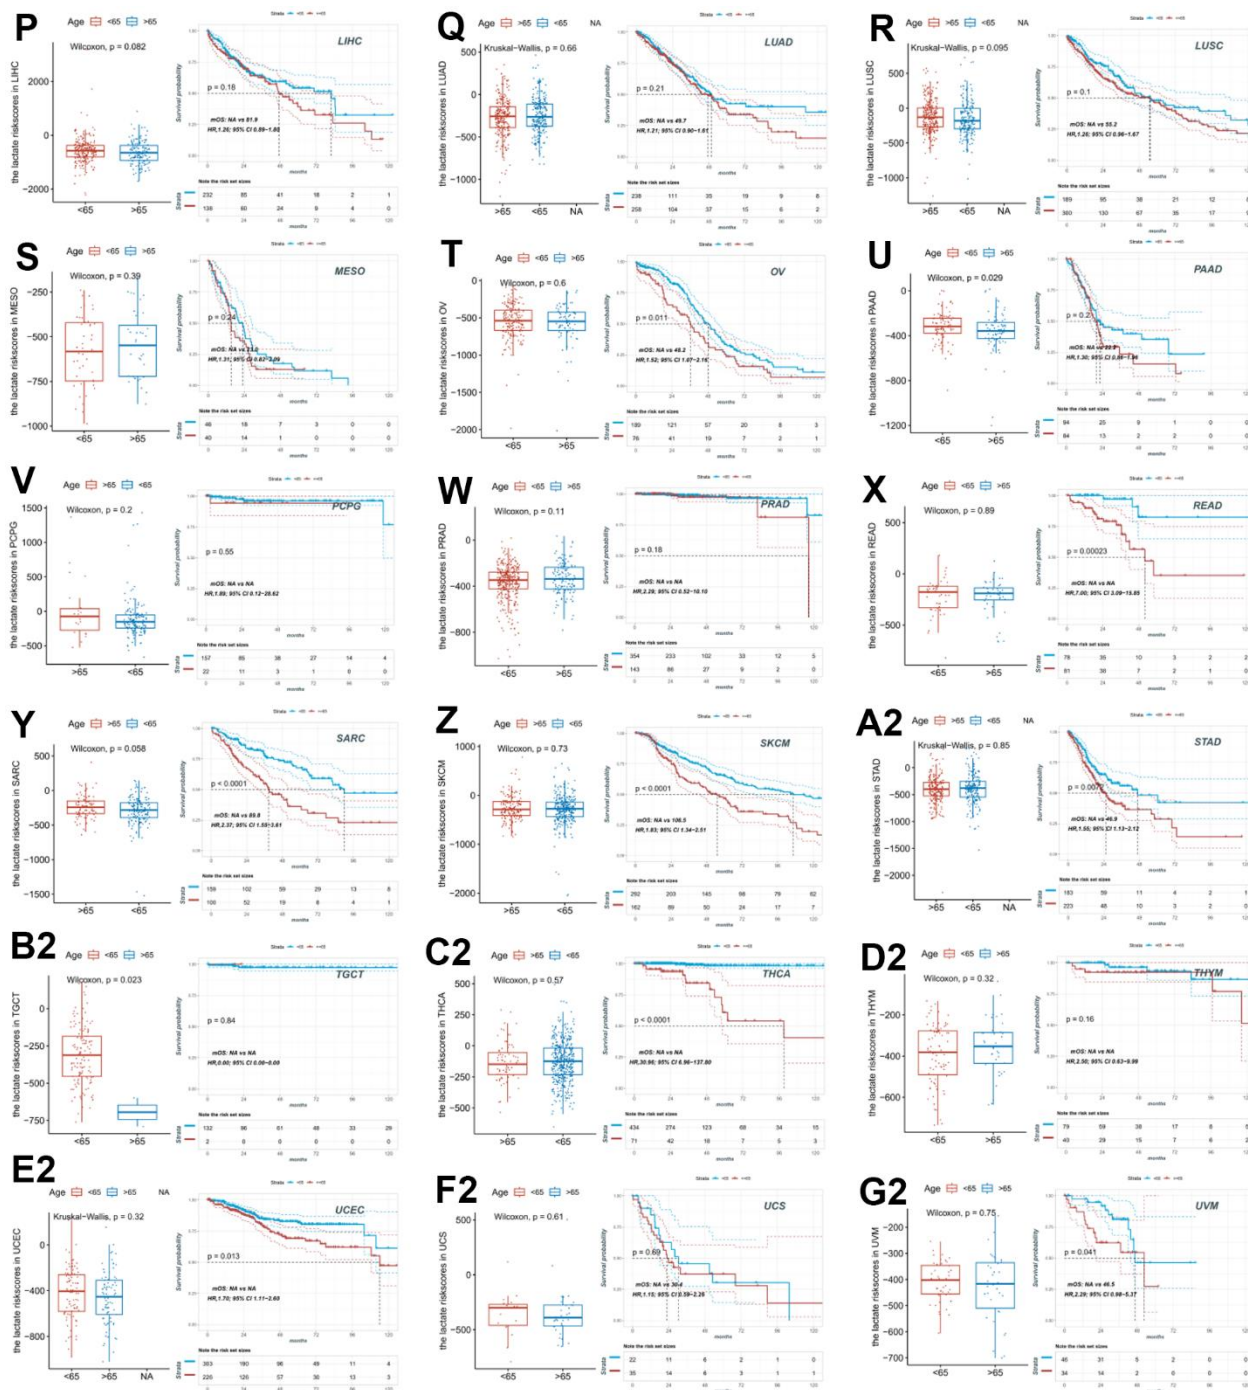

**Supplementary Figure 2. The impact of the age on the lactate scores and the prognosis in pan-cancer.** The boxplots of lactate scores and the KM plots between patients aged >65 and <65 years old with different tumors (A–G2).
